# Supplementary material
Source: publisher figshare collection journal article supplement (https://sage.figshare.com/ndownloader/files/24456129)
Supplement: Supplementary file 1 [file 24456129]

**Supplemental Table A2.** Organ procurement organization (OPO) full names with four-letter codes and locations.

| <b>OPO Code</b> | <b>Center Name</b>                                      | <b>City</b>     | <b>State</b> |
|-----------------|---------------------------------------------------------|-----------------|--------------|
| ALOB            | Legacy of Hope                                          | Birmingham      | AL           |
| AROR            | Arkansas Regional Organ Recovery Agency                 | Little Rock     | AR           |
| AZOB            | Donor Network of Arizona                                | Phoenix         | AZ           |
| CADN            | Donor Network West                                      | San Ramon       | CA           |
| CAGS            | Sierra Donor Services                                   | West Sacramento | CA           |
| CAOP            | OneLegacy                                               | Los Angeles     | CA           |
| CASD            | Lifesharing - A Donate Life Organization                | San Diego       | CA           |
| CORS            | Donor Alliance                                          | Denver          | CO           |
| CTOP            | LifeChoice Donor Services                               | Waltham         | MA           |
| DCTC            | Washington Regional Transplant Community                | Falls Church    | VA           |
| FLFH            | TransLife                                               | Maitland        | FL           |
| FLMP            | Life Alliance Organ Recovery Agency                     | Miami           | FL           |
| FLUF            | LifeQuest Organ Recovery Services                       | Gainesville     | FL           |
| FLWC            | LifeLink of Florida                                     | Tampa           | FL           |
| GALL            | LifeLink of Georgia                                     | Norcross        | GA           |
| HIOP            | Legacy of Life Hawaii                                   | Honolulu        | HI           |
| IAOP            | Iowa Donor Network                                      | North Liberty   | IA           |
| ILIP            | Gift of Hope Organ & Tissue Donor Network               | Itasca          | IL           |
| INOP            | Indiana Donor Network                                   | Indianapolis    | IN           |
| KYDA            | Kentucky Organ Donor Affiliates                         | Louisville      | KY           |
| LAOP            | Louisiana Organ Procurement Agency                      | Covington       | LA           |
| MAOB            | New England Organ Bank                                  | Waltham         | MA           |
| MDPC            | The Living Legacy Foundation of Maryland                | Baltimore       | MD           |
| MIOP            | Gift of Life Michigan                                   | Ann Arbor       | MI           |
| MNOP            | LifeSource Upper Midwest Organ Procurement Organization | Minneapolis     | MN           |
| MOM A           | Mid-America Transplant Services                         | St Louis        | MO           |
| MSOP            | Mississippi Organ Recovery Agency                       | Flowood         | MS           |
| MWO B           | Midwest Transplant Network                              | Westwood        | KS           |
| NCCM            | LifeShare Carolinas                                     | Charlotte       | NC           |
| NCNC            | Carolina Donor Services                                 | Greenville      | NC           |
| NEOR            | Live On Nebraska                                        | Omaha           | NE           |
| NJTO            | New Jersey Organ and Tissue Sharing Network OPO         | New Providence  | NJ           |

| <b>OPO Code</b> | <b>Center Name</b>                              | <b>City</b>    | <b>State</b> |
|-----------------|-------------------------------------------------|----------------|--------------|
| NMOP            | New Mexico Donor Services                       | Albuquerque    | NM           |
| NVLV            | Nevada Donor Network                            | Las Vegas      | NV           |
| NYAP            | Center for Donation and Transplant              | Albany         | NY           |
| NYFL            | Finger Lakes Donor Recovery Network             | Rochester      | NY           |
| NYRT            | LiveOnNY                                        | New York       | NY           |
| NYWN            | Upstate New York Transplant Services Inc        | Williamsville  | NY           |
| OHLB            | Lifebanc                                        | Cleveland      | OH           |
| OHLC            | Life Connection of Ohio                         | Maumee         | OH           |
| OHLP            | Lifeline of Ohio                                | Columbus       | OH           |
| HOV             | LifeCenter Organ Donor Network                  | Cincinnati     | OH           |
| OKOP            | LifeShare Transplant Donor Services of Oklahoma | Oklahoma City  | OK           |
| ORUO            | Pacific Northwest Transplant Bank               | Portland       | OR           |
| PADV            | Gift of Life Donor Program                      | Philadelphia   | PA           |
| PATF            | Center for Organ Recovery and Education         | Pittsburgh     | PA           |
| PRL             | LifeLink of Puerto Rico                         | Guaynabo       | PR           |
| SCOP            | We Are Sharing Hope SC                          | Charleston     | SC           |
| TNDS            | Tennessee Donor Services                        | Nashville      | TN           |
| TNMS            | Mid-South Transplant Foundation                 | Cordova        | TN           |
| TXGC            | LifeGift Organ Donation Center                  | Fort Worth     | TX           |
| TXSA            | Texas Organ Sharing Alliance                    | San Antonio    | TX           |
| TXSB            | Southwest Transplant Alliance                   | Dallas         | TX           |
| UTOP            | DonorConnect                                    | Salt Lake City | UT           |
| VATB            | LifeNet Health                                  | Virginia Beach | VA           |
| WALC            | LifeCenter Northwest                            | Bellevue       | WA           |
| WIDN            | Versiti Wisconsin, Inc                          | Milwaukee      | WI           |
| WIUW            | UW Health Organ and Tissue Donation             | Madison        | WI           |
